# Supplementary material for: Nitrate sensing by the maize root apex transition zone: a merged transcriptomic and proteomic survey
Source: PubMed Central journal article supplement (PMC4473975; doi:10.1093/jxb/erv165), 2015-04-23
Supplement: supp_erv165_jexbot143826_file001.pdf [file supp_erv165_jexbot143826_file001.pdf]

**Nitrate sensing by maize root apex transition zone: a merged transcriptomic and proteomic survey**

Sara Trevisan, Alessandro Manoli, Laura Ravazzolo, Alessandro Botton, Micaela Pivato, Antonio Masi, and Silvia Quaggiotti

*Supplemental Tables S1 (qPCR Primer list) and S4b (qPCR Validation Dataset)*

**Supplementary Table S1.** List of primers used in Real Time qPCR analyses.

| Primer            | Fw Sequence 5' to 3'   | Rev Sequence 5' to 3'   |
|-------------------|------------------------|-------------------------|
| GRMZM2G035370_T01 | ACGGCAGGAGGAGGAAGAT    | GTCAAACCCTACGATTACAAAGC |
| GRMZM2G145914_T01 | GGTACAACAAGCACCTTCCG   | AACTCCGCTAAACCGCTACT    |
| GRMZM2G001205     | GACTGCCTTGGCTACTAGATAG | CCTCCGCCCAGAAGCAAAT     |
| GRMZM2G029518     | CCGCATTAGTGTCAGTCCATTC | CCGGATGCAACGACCTTAAC    |
| GRMZM2G125482     | AGGAGGAGTTCAGCATGGAG   | CGGCAACAACAGGAGCAATA    |
| GRMZM2G046532     | AGCCAACACACACAAAATACT  | TTCCTCGCCGACACCATAG     |
| GRMZM2G106190     | CCTGCATCTCTACCCCAAG    | AGCCCATCTCAACAACGAAAC   |
| GRMZM2G179294     | CGATGAGTGGCTGTCGTTG    | TTGAGCCCCTCCATTCGTAA    |
| GRMZM2G080183     | TCCGTCCATTCATCCATCCA   | CCGTGGCATTCAATTTACATTGG |
| GRMZM2G036629     | CTGGTCTGACTCTGGCTCTC   | AGCCAATCGTTACAGGGACA    |
| GRMZM2G112782_T01 | TGACTGGTGGTGTCTCTCG    | CCTCCTTTGGCAGCAATCAG    |
| GRMZM2G340444     | GAGAACAATCACCCCAAGTCA  | AGGTCGCAAATGAGGAAAGC    |
| GRMZM5G856929     | GCCACGTCGCTGGGAAT      | AGAATCAAACCTCTCTGCAAGGA |
| GRMZM2G008353     | GTTTTGGCATCTGTCACCGT   | AGCGGCACAACATATGAACA    |
| GRMZM2G044902     | GCCAAACCAAACCAAACCAC   | TACCGCTACTACGCAACCAA    |
| GRMZM2G021427     | CTACTGCGCTCTGATTCCCT   | GCCTTGGTCACACTGATTCA    |
| GRMZM2G146004     | AGGTGTTCTGTCGTCTTGGT   | TGCTCTGCTCTGCTCTGAAT    |
| GRMZM2G004161_T04 | CCAACAGGAAGCAGATGAGC   | CGTAGGGTGACAAAGTAGGC    |
| GRMZM2G118951     | CCCAGGCATTTTCTTTTCTTT  | AATTGCCGCCACTCAACG      |
| GRMZM2G177077     | CACTATCTCGCCGCCAAGTA   | TGCCCCGCTTATTCTCATCT    |
| GRMZM2G058760     | GCCCAGCTCAAGAAGAACAA   | CTTTACACCGCCCCGAGAA     |
| GRMZM2G105604_T01 | AGTGGTATCCTTGTCACCCT   | GTCGAACCTGTGCTCCCATA    |
| GRMZM2G366659     | ATTACGTGGACTAGGCACCA   | CGAAACGGCGAACTTCAACT    |
| GRMZM2G009223     | TCATCGTCGCGTCCATCAT    | TTCGGCGGTGAACCTGAAC     |
| GRMZM2G440208     | AGGGATGTTTTCTGCTTTGTGT | CATTGGAGTTTGAGAGGCATCA  |
| GRMZM2G105348     | GTTCGGCAGCGATTACCTG    | CCACTTCAGTCCAACACGTC    |
| GRMZM2G124495     | CGAAGATAAGCTAGCCTGTCG  | CCTCCAAAACACTCGTCGTC    |
| GRMZM2G099642     | AGCTGGCGTAGAAAGAGAAC   | CCCACTACCCCAATAAAGCC    |
| GRMZM2G181081_T04 | CACTTGGCTGCGTGTAAGGA   | GAATGTGCCTTCGCTATGG     |
| GRMZM2G167520_T01 | TAGGGAAGGCAAGGCAAGG    | TGAATGCACATCTGAACCTGT   |
| GRMZM2G143469     | GCTAACAGAGTACGCAACAGG  | CCAAACAGGGCAGCACAAA     |
| GRMZM2G134432     | GAGGCGGCTCAAATCAGAC    | AGGGTTGTTTACGAGACAGGA   |
| GRMZM2G070603     | GCAGGACCAGGCTGTTACA    | TGCTGATGGACGATGGATCT    |
| GRMZM2G166082_T02 | AGCAGGCTGAGGAATGTGAA   | TCAAACATCACGCAAACCTGT   |
| GRMZM2G145008     | CGTCTTGACTTGGCATGTT    | CCCGGTAGTGCTGAATAATCA   |
| GRMZM2G168898     | GGCTGTTGATGCTTCCTAGC   | ATGACGGGCCTTTTCTGAAT    |
| GRMZM2G079381_T02 | CTTCA TGGGCTGCCTCAC    | CGCTTGACGAAGGTCCTACT    |
| GRMZM2G067402_T02 | GGAGCCTCGAGA TGAAGAAA  | ACAATACACGCTCCCTCCAG    |
| GRMZM2G568636     | ATGATCCAGTTCGCCATCTC   | GTCCGTGGTACGTCGTAGGT    |
| GRMZM2G015933     | TCCTCTCCCTTGTCGTTGTT   | AGCCTTGA TCCAGGACTCTTC  |
| GRMZM2G010251     | GAGAAGAGCAAGGGACTCCA   | CTCA TGTC AACGGAGCACAC  |

Supplementary Table S4. List of 41 selected DEGs obtained from RNAseq analysis carried out on zone 2 of nitrate starved seedlings after 2h of nitrate supply (+N) or depletion (-N). DEGs were divided into up-regulated or down regulated according to their +N/-N RPKM ratios. DEGs which expression profiles were not confirmed by Real time PCR were evidenced in grey. no\*=  $p \leq 0.01$ , FDR  $\leq 0.05$ ; no\*\*= FDR  $> 0.05$ .

| Gene ID             | Description                                                                  | -N    | +N     | Significant | Orthologs                                                                                       |
|---------------------|------------------------------------------------------------------------------|-------|--------|-------------|-------------------------------------------------------------------------------------------------|
| <b>Up-regulated</b> |                                                                              |       |        |             |                                                                                                 |
| GRMZM2G168898       | Non-symbiotic hemoglobin 2, <i>Hb2</i>                                       | 0.02  | 50.63  | yes         | AT2G16060; <i>GLB1</i> hemoglobin 1                                                             |
| GRMZM2G029518       | Fibroin heavy chain                                                          | 0.04  | 8.33   | yes         | LOC_Os10g31540.1, glycine-rich cell wall structural protein 2 precursor ( <i>Oryza sativa</i> ) |
| GRMZM2G124495       | Putative MYB DNA-binding domain superfamily protein                          | 0.04  | 5.36   | yes         | AT5G06800; myb-like HTH transcriptional regulator                                               |
| GRMZM2G143469       | One-helix protein 2, <i>OHP2</i>                                             | 0.04  | 5.33   | yes         | AT1G34000; <i>OHP2</i> one-helix protein 2                                                      |
| GRMZM2G105604_T01   | Uncharacterized protein, Uroporphyrin-III C-methyltransferase conserved site | 2.56  | 108.95 | yes         | AT5G40850.1; <i>UPMI</i> , uroporphyrin methylase 1                                             |
| GRMZM2G004161_T04   | Uncharacterized protein, TAZ-type domain                                     | 3.36  | 97.19  | yes         | AT3G48360; <i>BT2</i> , BTB and TAZ domain protein 2                                            |
| GRMZM2G146004       | Uncharacterized protein, LEA-5 protein domain                                | 4.55  | 129.39 | yes         | AT4G02380.1; AtLEA5                                                                             |
| GRMZM2G079381_T02   | Ferredoxin-nitrite reductase, <i>NiR</i>                                     | 3.03  | 81.53  | yes         | AT2G15620; <i>NIR1</i> , nitrite reductase 1                                                    |
| GRMZM2G067402_T02   | Non-symbiotic hemoglobin, <i>Hb</i>                                          | 39.31 | 930.71 | yes         | AT2G16060; <i>GLB1</i> , hemoglobin 1                                                           |
| GRMZM2G106190       | <i>FDX6</i>                                                                  | 34.99 | 806.8  | yes         | AT5G10000; <i>ATFD4</i> , ferredoxin 4                                                          |
| GRMZM2G058760       | Uncharacterized protein, Ferredoxin reductase-type FAD-binding domain        | 35.93 | 653.95 | yes         | AT1G30510; <i>ATRFNR2</i>                                                                       |
| GRMZM2G177077       | Glucose-6-phosphate 1-dehydrogenase                                          | 8.62  | 156.22 | yes         | AT5G13110; <i>G6PD2</i>                                                                         |
| GRMZM2G035370_T01   | Myb domain                                                                   | 0.18  | 3.12   | no          | AT5G06800; myb-like HTH transcriptional regulator                                               |
| GRMZM2G009223       | Glucose-6-phosphate/phosphate translocator 2                                 | 0.47  | 7.31   | yes         | AT1G61800; <i>GPT2</i>                                                                          |
| GRMZM2G145008       | Uncharacterized protein, ArfGap/RecO-like zinc finger protein domain         | 0.03  | 0.4    | no*         | AT1G08680; <i>ZIGA4</i> , ARF GAP-like zinc finger-containing protein                           |
| GRMZM2G440208       | 6-phosphogluconate dehydrogenase, decarboxylating                            | 34.28 | 438.05 | yes         | AT1G64190; 6-phosphogluconate dehydrogenase                                                     |
| GRMZM2G181081_T04   | CIPK-like protein 1                                                          | 1.15  | 13.8   | yes         | AT2G26980; <i>CIPK3</i> , CBL-interacting protein kinase 3                                      |
| GRMZM2G145914_T01   | Uncharacterized protein, Oxoglutarate/iron-dependent dioxygenase domain      | 2.65  | 24.93  | yes         | AT2G48080; oxidoreductase, 2OG-Fe(II) oxygenase                                                 |
| GRMZM2G568636       | Nitrate reductase (NADH), <i>NR1</i>                                         | 1.23  | 9.05   | no *        | AT1G37130; <i>NIA2</i> , nitrate reductase 2                                                    |
| GRMZM2G167520_T01   | Brittle stalk-2-like protein 6, COBRA-Like domain                            | 1.13  | 7.59   | yes         | AT3G02210; <i>COBL1</i> , COBRA-like protein 1 precursor                                        |
| GRMZM2G015933       | BRASSINOSTEROID INSENSITIVE 1-associated receptor kinase 1, <i>BRI1</i>      | 0     | 0.07   | no**        | AT1G71830.1; <i>ATSERK1</i> , somatic embryogenesis receptor-like kinase 1                      |
| GRMZM2G366659       | Putative trehalose phosphatase/synthase family protein                       | 5.24  | 31.18  | yes         | AT1G23870; <i>ATTPS9</i>                                                                        |
| GRMZM5G856929       | Uncharacterized protein, Galactose oxidase central domain                    | 1.65  | 8.95   | yes         | AT1G31350; <i>KUF1</i>                                                                          |
| GRMZM2G046532       | Flower-specific gamma-thionin                                                | 2.5   | 13.11  | no*         | AT2G02130.1; <i>LCR68</i>                                                                       |
| GRMZM2G044902_T03   | Uncharacterized protein, LOB domain                                          | 8.22  | 39.42  | yes         | AT5G67420.1; <i>LBD37</i>                                                                       |

|                       |                                                                  |        |        |      |                                                                                        |
|-----------------------|------------------------------------------------------------------|--------|--------|------|----------------------------------------------------------------------------------------|
| GRMZM2G179294         | <i>NAR2.1</i>                                                    | 67.91  | 322.89 | yes  | AT5G50200.1; <i>ATNRT3.1</i>                                                           |
| GRMZM2G001205         | ZFP16-1, Zinc finger, C2H2-like domain                           | 8.54   | 40.45  | yes  | AT5G59820.1; <i>RHL41</i> , ZAT12, C2H2-type zinc finger                               |
| GRMZM2G008353         | Uncharacterized protein, Phosphate-induced protein 1 domain      | 40.5   | 174.11 | yes  | AT4G08950.1; <i>EXO</i>                                                                |
| GRMZM2G010251         | High affinity nitrate transporter, <i>NRT2.1</i>                 | 0.97   | 4.1    | yes  | AT5G60770.1; <i>NRT2.4</i>                                                             |
| GRMZM2G340444_T01     | Putative RING zinc finger domain superfamily protein             | 2.1    | 8.43   | no*  | AT4G40070.1; RING/U-box superfamily protein                                            |
| GRMZM2G080183         | Uncharacterized protein, Haem peroxidase domain                  | 21.07  | 74.19  | no*  | AT2G18980.1; Peroxidase superfamily protein                                            |
| GRMZM2G036629         | Metallothionein-like protein 1                                   | 140.87 | 417.25 | no*  | AT3G09390.1; <i>ATMT-1</i> , metallothionein 2A                                        |
| GRMZM2G166082_T02     | Unknown protein                                                  | 1.1    | 2.86   | no** | AT2G16270.1; unknown protein                                                           |
| <b>Down-regulated</b> |                                                                  |        |        |      |                                                                                        |
| GRMZM2G118951         | NDR1/HIN1-Like protein 2                                         | 136.67 | 57.31  | no** | AT1G17620.1; Late embryogenesis abundant (LEA) hydroxyproline-rich glycoprotein family |
| GRMZM2G112782_T01     | Uncharacterized protein, SNARE protein domain                    | 29.38  | 10.55  | no*  | AT4G30240.1; Syntaxin/t-SNARE family protein                                           |
| GRMZM2G125482         | Flavonoid 3-monooxygenase                                        | 21.29  | 6.32   | yes  | AT5G07990.1; CYP75B1, Cytochrome P450 superfamily                                      |
| GRMZM2G021427         | Uncharacterized protein, RlpA-like double-psi beta-barrel domain | 32.17  | 7.15   | yes  | AT1G65680.1; <i>ATEXPB2</i>                                                            |
| GRMZM2G070603         | Peroxidase 1                                                     | 7.1    | 1.57   | yes  | AT1G05260.1; <i>RCI3</i> , Peroxidase superfamily                                      |
| GRMZM2G105348         | Uncharacterized protein, Heat shock factor (HSF)-type            | 6.34   | 1.2    | yes  | AT3G24520.1; <i>AT-HSFC1</i> w                                                         |
| GRMZM2G099642         | Putative alcohol dehydrogenase superfamily protein               | 9.03   | 0.93   | yes  | AT5G17000.1; Zinc-binding dehydrogenase                                                |
| GRMZM2G134432         | Uncharacterized protein, PK-like domain                          | 1.43   | 0.14   | yes  | AT2G19130.1; S-locus lectin protein                                                    |
